# Supplementary material for: Racial Disparities and Upward Trend in Bowel Preparation for Elective Colectomy in the National Surgical Quality Improvement Program Procedure Targeted Dataset: 2012 to 2018
Source: PubMed Central journal article supplement — Ann Surg Open. 2021 Sep 2;2(3):e092. doi: 10.1097/AS9.0000000000000092 (PMC10455214; doi:10.1097/as9.0000000000000092), 2021-09-02
Supplement: as9-2-e092-s001.pdf [file as9-2-e092-s001.pdf]

**Supplemental** Table 1. Descriptive statistics for the National Surgical Quality Improvement Program's Procedure-Targeted Colectomy database from 2012-2018.

| Year      | Number of Participating Hospitals | Number of Cases |
|-----------|-----------------------------------|-----------------|
| 2011/2012 | 121                               | 16,981          |
| 2013      | 154                               | 21,505          |
| 2014      | 203                               | 25,262          |
| 2015      | 239                               | 31,307          |
| 2016      | 274                               | 35,908          |
| 2017      | 285                               | 38,139          |
| 2018      | 343                               | 41,386          |
