# Supplementary material for: Racial Disparities and Upward Trend in Bowel Preparation for Elective Colectomy in the National Surgical Quality Improvement Program Procedure Targeted Dataset: 2012 to 2018
Source: PubMed Central journal article supplement — Ann Surg Open. 2021 Sep 2;2(3):e092. doi: 10.1097/AS9.0000000000000092 (PMC10455214; doi:10.1097/as9.0000000000000092), 2021-09-02
Supplement: as9-2-e092-s002.pdf [file as9-2-e092-s002.pdf]

**Supplemental Table 2. Sensitivity analysis -** Multivariable logistic regression of patient and procedure-related determinants of any bowel preparation among patients in the NSQIP database who underwent elective colectomy between 2012-2018 (N = 87,481)<sup>a</sup>

| Characteristic            | Any bowel preparation <sup>b</sup> |            |         |
|---------------------------|------------------------------------|------------|---------|
|                           | aOR                                | 95% CI     | P-value |
| <b>Operative Year</b>     |                                    |            |         |
| 2012                      | Reference                          | -          | -       |
| 2013                      | 0.95                               | 0.88, 1.02 | 0.15    |
| 2014                      | 0.81                               | 0.76, 0.88 | < 0.01  |
| 2015                      | 0.92                               | 0.86, 0.99 | 0.03    |
| 2016                      | 1.00                               | 0.94, 1.08 | 0.83    |
| 2017                      | 1.34                               | 1.25, 1.44 | < 0.01  |
| 2018                      | 1.38                               | 1.28, 1.48 | < 0.01  |
| <b>Age</b>                |                                    |            |         |
| < 30 years old            | 0.77                               | 0.73, 0.89 | < 0.01  |
| 30-39 years old           | 0.90                               | 0.84, 0.98 | 0.01    |
| 40-49 years old           | 0.99                               | 0.92, 1.03 | 0.36    |
| 50-59 years old           | 1.00                               | 0.96, 1.05 | 0.79    |
| 60-69 years old           | Reference                          | -          | -       |
| 70-79 years old           | 0.90                               | 0.86, 0.94 | < 0.01  |
| 80-89 years old           | 0.81                               | 0.77, 0.87 | < 0.01  |
| <b>Sex</b>                |                                    |            |         |
| Female                    | Reference                          | -          | -       |
| Male                      | 1.04                               | 1.01, 1.07 | 0.02    |
| <b>Race</b>               |                                    |            |         |
| White                     | Reference                          | -          | -       |
| Black or African American | 0.88                               | 0.84, 0.93 | < 0.01  |
| Other                     | 0.99                               | 0.91, 1.07 | 0.73    |
| Unknown/Not Reported      | 0.72                               | 0.67, 0.77 | < 0.01  |
| <b>Ethnicity</b>          |                                    |            |         |
| Not Hispanic              | Reference                          | -          | -       |
| Hispanic                  | 0.87                               | 0.80, 0.93 | < 0.01  |

|                                                                                                                                                                                                                                                                                       |           |            |        |
|---------------------------------------------------------------------------------------------------------------------------------------------------------------------------------------------------------------------------------------------------------------------------------------|-----------|------------|--------|
| Unknown/Not Reported                                                                                                                                                                                                                                                                  | 0.59      | 0.55, 0.64 | < 0.01 |
| Body Mass Index                                                                                                                                                                                                                                                                       |           |            |        |
| Normal weight (BMI = 18.5 – 24.9)                                                                                                                                                                                                                                                     | Reference |            |        |
| Overweight (BMI = 25.0 – 29.9)                                                                                                                                                                                                                                                        | 1.02      | 0.98, 1.07 | 0.27   |
| Obese (BMI ≥ 30)                                                                                                                                                                                                                                                                      | 1.04      | 1.00, 1.08 | 0.07   |
| Underweight (BMI < 18.5)                                                                                                                                                                                                                                                              | 0.84      | 0.76, 0.93 | < 0.01 |
| History of Congestive Heart Failure                                                                                                                                                                                                                                                   | 0.78      | 0.65, 0.95 | 0.01   |
| High blood urea nitrogen (BUN > 25)                                                                                                                                                                                                                                                   | 0.90      | 0.84, 0.96 | < 0.01 |
| Indication for Surgery                                                                                                                                                                                                                                                                |           |            |        |
| Colon cancer                                                                                                                                                                                                                                                                          | Reference | -          | -      |
| Colon cancer with obstruction                                                                                                                                                                                                                                                         | 0.62      | 0.57, 0.68 | < 0.01 |
| Acute diverticulitis                                                                                                                                                                                                                                                                  | 0.93      | 0.87, 1.00 | 0.05   |
| Bleeding                                                                                                                                                                                                                                                                              | 0.64      | 0.48, 0.85 | < 0.01 |
| Chronic diverticular disease                                                                                                                                                                                                                                                          | 1.18      | 1.13, 1.23 | < 0.01 |
| Crohn's disease                                                                                                                                                                                                                                                                       | 0.62      | 0.58, 0.67 | < 0.01 |
| Enterocolitis (i.e. <i>C. difficile</i> )                                                                                                                                                                                                                                             | 0.48      | 0.24, 0.99 | 0.05   |
| Non-malignant polyp                                                                                                                                                                                                                                                                   | 0.93      | 0.88, 0.97 | < 0.01 |
| Ulcerative colitis                                                                                                                                                                                                                                                                    | 0.56      | 0.53, 0.63 | < 0.01 |
| Volvulus                                                                                                                                                                                                                                                                              | 0.53      | 0.44, 0.64 | < 0.01 |
| Surgical Approach                                                                                                                                                                                                                                                                     |           |            |        |
| Open                                                                                                                                                                                                                                                                                  | Reference | -          | -      |
| Minimally invasive                                                                                                                                                                                                                                                                    | 1.20      | 1.16, 1.25 | < 0.01 |
| Colectomy Laterality                                                                                                                                                                                                                                                                  |           |            |        |
| Left                                                                                                                                                                                                                                                                                  |           |            |        |
| Right                                                                                                                                                                                                                                                                                 | 0.74      | 0.71, 0.77 | < 0.01 |
| aOR = adjusted odds ratio; CI = confidence interval; SD = standard deviation; <sup>a</sup> Listwise deletion of variables with missing data reduced the total sample size, though not enough to decrement the power of the study; <sup>b</sup> Any bowel prep = mechanical only, both |           |            |        |
